# Supplementary material
Source: PubMed Central journal article supplement (PMC3621313)
Supplement: Supp_Data.pdf [file Supp_Data.pdf]

## Supplementary Data

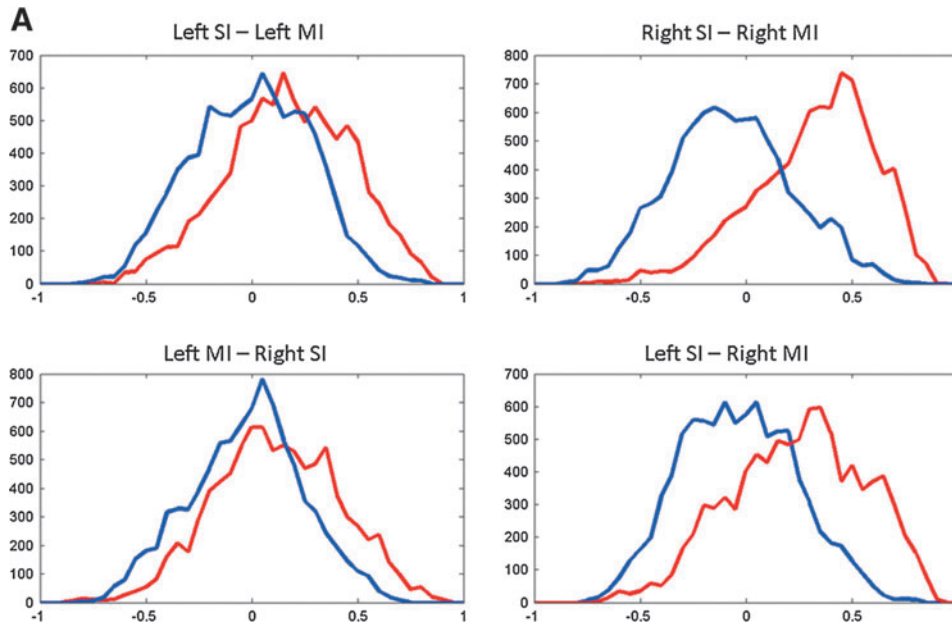

**SUPPLEMENTARY FIG. S1.** Histograms of correlation coefficients after sliding window correlation with a window length of 50 images (all rats, all scans). Real data are shown in red, and results for randomly matched time courses are shown in blue. **(A)** Histograms for SI-MI connections, which are shifted to positive values and sometimes skewed as compared with the randomized data. **(B)** Histograms for the remaining pairs of areas, which are similar to those for random data. Histograms for homologous areas in left and right hemispheres were shown in Figure 4.

**B(a)**

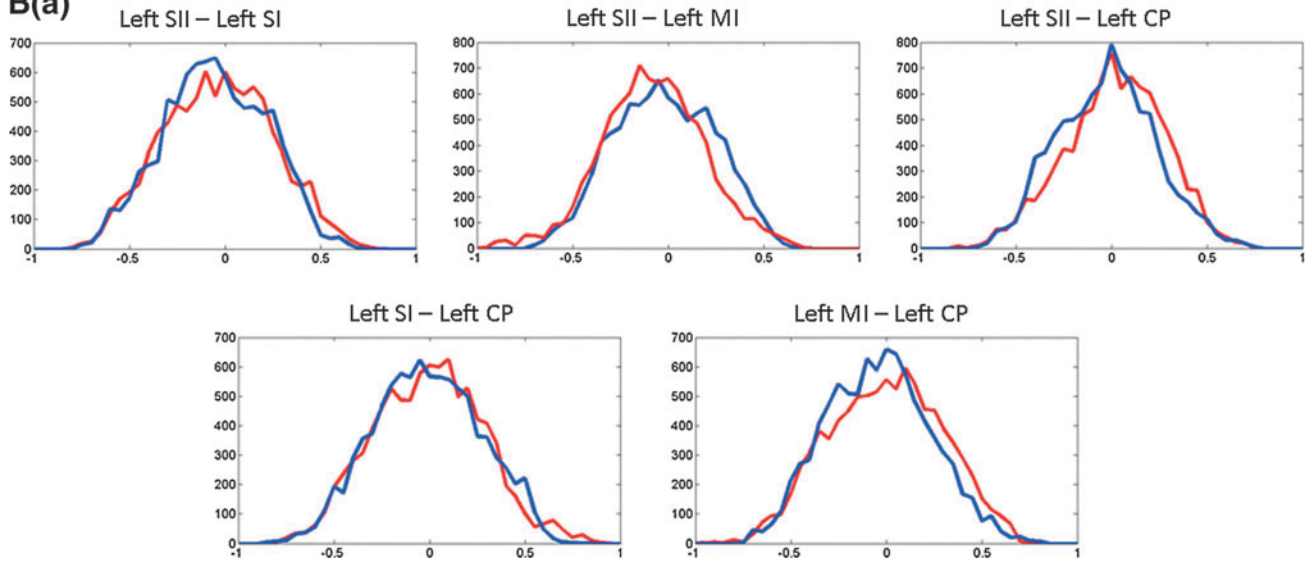

**B(c)**

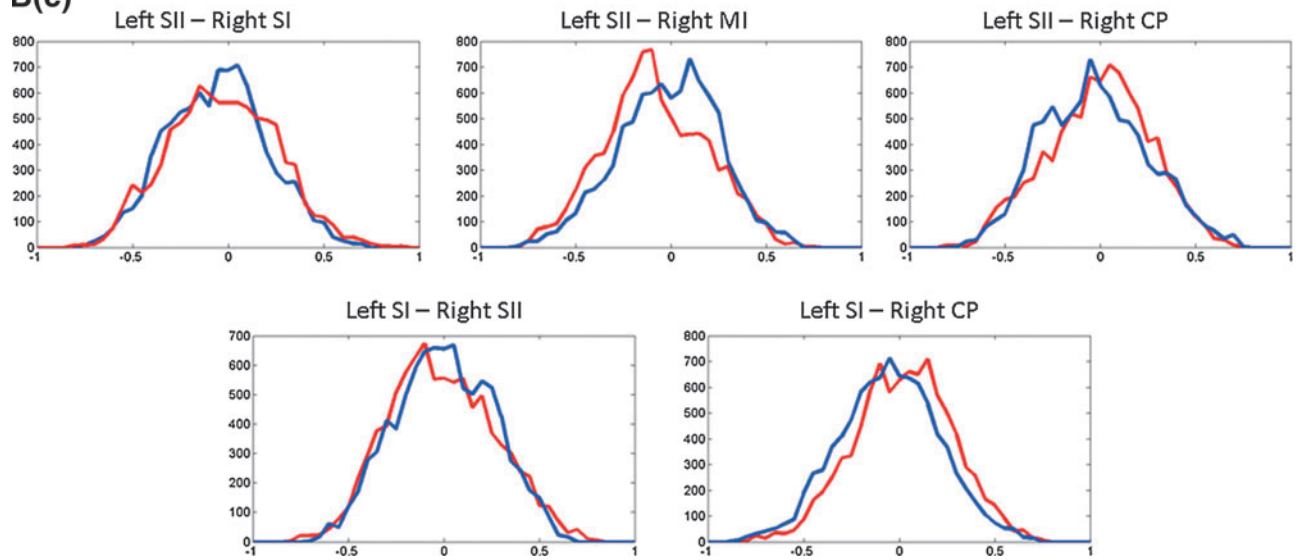

**B(d)**

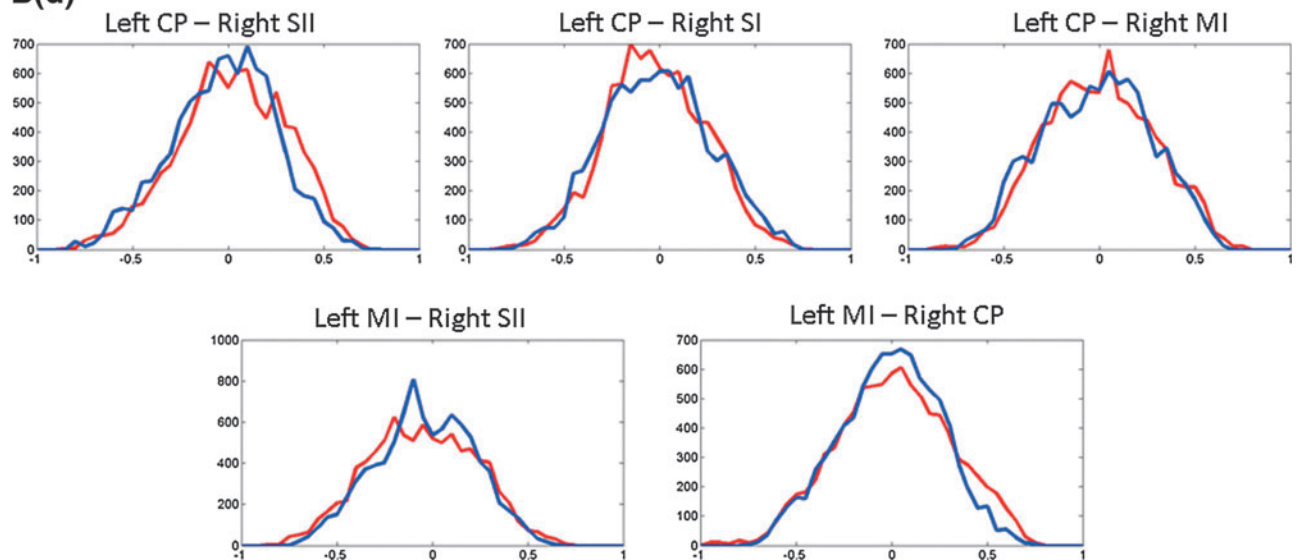

SUPPLEMENTARY FIG. S1. (Continued).
